# Supplementary material for: Hemiacetal-linked pH-sensitive PEG-lipids for non-viral gene delivery
Source: Royal Society of Chemistry journal article supplement (doi:10.1039/d2nj02217f), 2022-01-01
Supplement: d2nj02217f1.pdf [file d2nj02217f1.pdf]

## Supporting information

### **Hemiacetal-linked pH-sensitive PEG-lipids for non-viral gene delivery**

Filipe Coelho<sup>1</sup>, Laura M. Salonen<sup>1,\*</sup>, Bruno F. B. Silva<sup>1,\*</sup>

<sup>1</sup>International Iberian Nanotechnology Laboratory (INL), Av. Mestre José Veiga, 4715-330 Braga, Portugal

[laura.salonen@inl.int](mailto:laura.salonen@inl.int); [bruno.silva@inl.int](mailto:bruno.silva@inl.int).

\*corresponding authors:

#### Table of contents:

|                                                   |    |
|---------------------------------------------------|----|
| 1. Materials and methods                          | 2  |
| 2. Synthetic procedures                           | 3  |
| 3. NMR spectra                                    | 7  |
| 4. Hydrolysis study of mPEG-C <sub>2</sub> -lipid | 12 |
| 5. Critical micellar concentration                | 14 |

## 1. Materials and Methods

Triethylamine (Et<sub>3</sub>N, 99%), *p*-toluenesulfonic acid (*p*-TsOH, 99%), chloroform (99%), diethyl ether (99%), 2-aminoethanol (99%), 3-aminopropanol (98%), 2-amino-2-hydroxymethyl-propane-1,3-diol (T, 99%), acetic acid (99%), sodium acetate, deuterium oxide (D<sub>2</sub>O, 99%), acetonitrile, acetonitrile-*d* (99%), methoxy polyethylene glycon 2000 kDa (mPEG—OH), *N,N*-dicyclohexylcarbodiimide (DCC, 99%), 4-(dimethylamino)pyridine (DMAP, 99%), and 5-formylbenzoic acid (97%) were purchased from Sigma-Aldrich. 4-(2-Hydroxyethyl)piperazine-1-ethanesulfonic acid (HEPES, 99%) and chloroform-*d* (CDCl<sub>3</sub>, 99%) were purchased from Acros Organics. Benzene (99%) and oleoyl chloride (80%) were purchased from TCI.

Unless stated otherwise, all reactions were performed in oven-dried glassware. Commercial reagents were used as received. Reactions were stirred magnetically and monitored by analytical thin-layer chromatography (TLC) using ALUGRAM® Xtra Sil G UV254 aluminum sheets. Reactions involving mPEG—OH were monitored by reverse-phase thin-layer chromatography using DC Kieselgel 60 RP-18 F254S aluminum sheets. Flash chromatography was performed employing silica gel (60 Å, 40–63 μm, 230–400 mesh, Macherey Nagel). Reverse-phase flash chromatography was performed employing reverse phase silica gel (90 Å, 40–63 μm, 230–400 mesh, Sigma-Aldrich).

Proton nuclear magnetic resonance (<sup>1</sup>H NMR) spectra were recorded on a 400 MHz Bruker Avance II spectrometer at the NMR service of University of Minho in Braga, Portugal. Proton chemical shifts are expressed in parts per million ( $\delta$  scale) and are calibrated using residual undeuterated solvent peak as an internal reference (CDCl<sub>3</sub>:  $\delta$  7.26). Data for <sup>1</sup>H NMR spectra are reported as follows: chemical shift ( $\delta$  ppm) (multiplicity, coupling constant (Hz), integration). Multiplicities are reported as follows: s = singlet, d = doublet, t = triplet, q = quartet, m = multiplet, br = broad, or combinations thereof. Carbon nuclear magnetic resonance (<sup>13</sup>C NMR) spectra were recorded on a 101 MHz Bruker Avance II spectrometer. Carbon chemical shifts are expressed in parts per million ( $\delta$  scale) and are referenced to the carbon resonances of the solvent (CDCl<sub>3</sub>:  $\delta$  77.16). <sup>1</sup>H and <sup>13</sup>C resonances were assigned with the aid of additional information from 1D and 2D NMR spectra (H,H-COSY, DEPT 135, HSQC, and HMBC).

## 2. Synthesis of mPEG-C<sub>n</sub>-lipid

### *N*-(2-Hydroxypropyl)oleamide (**4**)

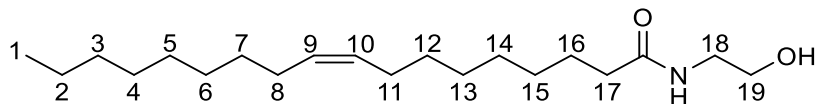

In a round-bottom flask under N<sub>2</sub>, to a solution of Et<sub>3</sub>N (516 mg, 5.10 mmol, 2 eq.) in dry CH<sub>2</sub>Cl<sub>2</sub> (25.0 mL) was added 2-aminoethanol (**2**) (472 mg, 7.73 mmol, 3 eq.). Then, oleoyl chloride (**1**) (950 mg, 2.53 mmol, 1 eq.) was added dropwise and the mixture was stirred at RT overnight. A white precipitate formed, which was removed by filtration. The filtrate was concentrated to give a yellow oil, which solidified as it cooled down. Purification by flash chromatography (SiO<sub>2</sub>; CH<sub>2</sub>Cl<sub>2</sub>/EtOAc 10:1→8:1→5:1→3:1) gave **4** (575 mg, 73% yield) as white solid.

<sup>1</sup>H NMR (400 MHz, CDCl<sub>3</sub>): 6.16 (s, H-N), 5.35 (m, 2 H, H-C(9, 10)), 3.73 (m, 2 H, H-C(19)), 3.43 (q, *J* = 5.2, 2 H, H-C(18)), 2.83 (s, H-O), 2.22 (t, *J* = 7.6 Hz, 2 H, H-C(17)), 2.01, (m, 4 H, H-C(8, 11)), 1.63 (m, 2 H, H-C(16)), 1.29 (m, 20 H, H-C(2, 3, 4, 5, 6, 7, 12, 13, 14, 15)), 0.88 (t, *J* = 6.9 Hz, 3 H, H-C(1)); <sup>13</sup>C NMR (101 MHz, CDCl<sub>3</sub>): 174.6, 129.9, 129.6, 62.0, 42.3, 36.6, 31.8, 29.69, 29.65, 29.45, 29.24, 29.22, 29.09, 27.15, 27.10, 25.7, 22.6, 14.0.

### *N*-(3-Hydroxypropyl)oleamide (**5**)

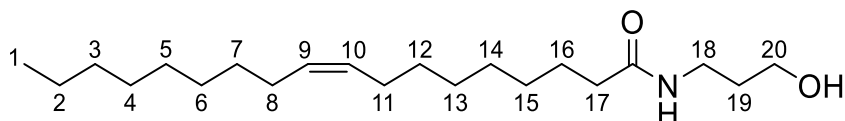

In a round-bottom flask under N<sub>2</sub>, to a solution of Et<sub>3</sub>N (494 mg, 4.88 mmol, 2 eq.) in dry CH<sub>2</sub>Cl<sub>2</sub> (25.0 mL) was added 3-amino-1-propanol (**3**) (550 mg, 7.33 mmol, 3 eq.). Then, oleoyl chloride (**1**) (910 mg, 2.99 mmol, 1 eq.) was added dropwise, and the mixture was stirred at RT overnight. A white precipitate formed, which was removed by filtration. The filtrate was concentrated to give a yellow oil, which solidified as it cooled down. Purification by flash chromatography (SiO<sub>2</sub>; CH<sub>2</sub>Cl<sub>2</sub>/EtOAc 1:0→8:1→5:1→3:1) gave **5** (790 mg, 88% yield) as white solid.

<sup>1</sup>H NMR (400 MHz, CDCl<sub>3</sub>): 6.27 (s, 1 H, H-N), 5.33 (m, 2H, H-C(9, 10)), 3.60 (t, *J* = 5.6 Hz, 2 H, H-C(20)), 3.45 (s, 1 H, H-O), 3.38 (q, *J* = 6.2 Hz, 2 H, H-C(18)), 2.17 (t, *J* = 7.6 Hz, 2 H, H-C(17)), 1.99 (m, 4 H, H-C(8, 11)), 1.66 (m, 2 H, H-C(19)), 1.61 (m, 2 H, H-C(16)), 1.27 (m, 20 H, H-C(2, 3, 4, 5, 6, 7, 12, 13, 14, 15)), 0.87 (t, *J* = 7.0 Hz, 3 H, H-C(1)); <sup>13</sup>C NMR (101 MHz, CDCl<sub>3</sub>): 175.3, 130.6,



## mPEG-C<sub>2</sub>-lipid (9)

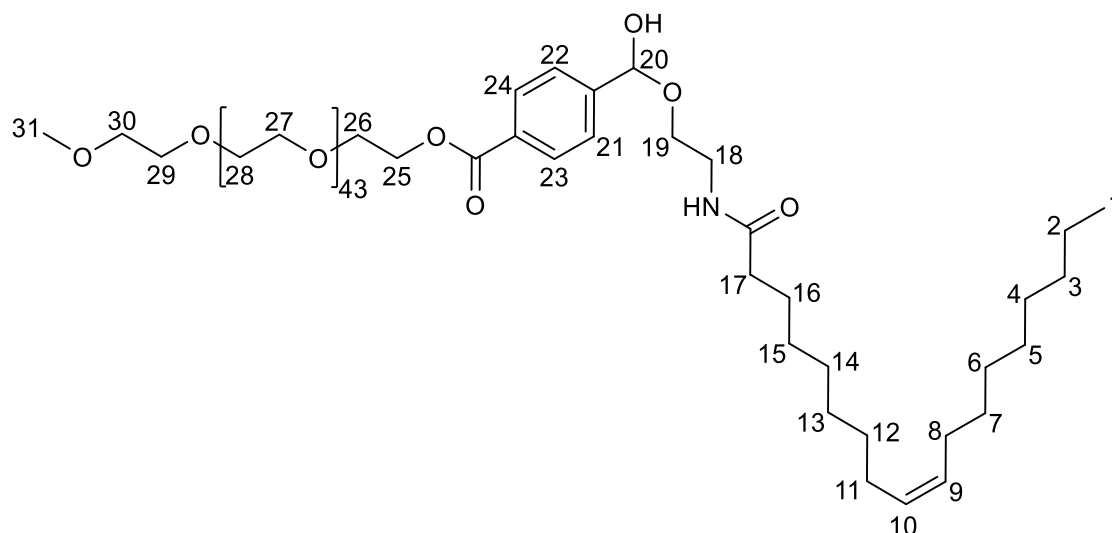

In a round-bottom flask, mPEG-benzaldehyde **8** (70 mg, 0.023 mmol, 1 eq.) and **3** (33 mg, 0.098 mmol, 5 eq.) were dissolved in benzene (3.0 mL). Then, *p*-TSOH (3.0 mg, 0.018 mmol, 1 eq.) was added. The reaction was left to stir for 2 h at 50 °C, after which the reaction mixture was heated to reflux for 18 h with Dean–Stark azeotropic removal of water. After cooling to RT, Et<sub>3</sub>N (0.50 mL) was added to neutralize the acid. Then, the solution was concentrated under vacuum giving a yellow oil, which was dissolved in diethyl ether to precipitate product **9** (80 mg, 96% yield) as a brown solid.

<sup>1</sup>H NMR (400 MHz, CDCl<sub>3</sub>): 8.33 (s, 1 H, H–C(20)), 8.07 (m, 2 H, H–C(21, 22)), 7.78 (m, 2 H, H–C(24, 25)), 5.31 (m, 2 H, H–C(9, 10)), 4.47 (m, 2 H, H–C(19)), 4.38 (t, *J* = 5.6 Hz, 2 H, H–C(18)), 3.83 (m, 4 H, H–C(25, 26)), 3.63 (m, 172 H, H–C(27, 28)), 3.53 (m, 2 H, H–C(29)), 3.45 (m, 2 H, H–C(30)), 3.36 (s, 3 H, H–C(31)), 2.26 (t, *J* = 7.5 Hz, 2 H, H–C(17)), 1.97 (m, 4 H, H–C(8, 11)), 1.55 (quint, *J* = 7.6 Hz, 2 H, H–C(16)), 1.26 (d, *J* = 13.3 Hz, 20 H, H–C(2, 3, 4, 5, 6, 7, 12, 13, 14, 15)), 0.86 (t, *J* = 6.8 Hz, 3 H, H–C(1)); <sup>13</sup>C NMR (101 MHz, CDCl<sub>3</sub>): 173.6, 165.9, 162.0, 139.7, 131.9, 129.9, 129.6, 127.9, 71.8, 70.56, 70.52, 70.50, 70.44, 70.39, 69.1, 64.2, 63.3, 59.8, 58.9, 34.1, 31.8, 29.6, 29.56, 29.54, 29.4, 29.2, 29.0, 28.98, 28.94, 28.93, 27.08, 27.04, 27.02, 24.8, 22.5, 14.0.



### 3. NMR Spectra

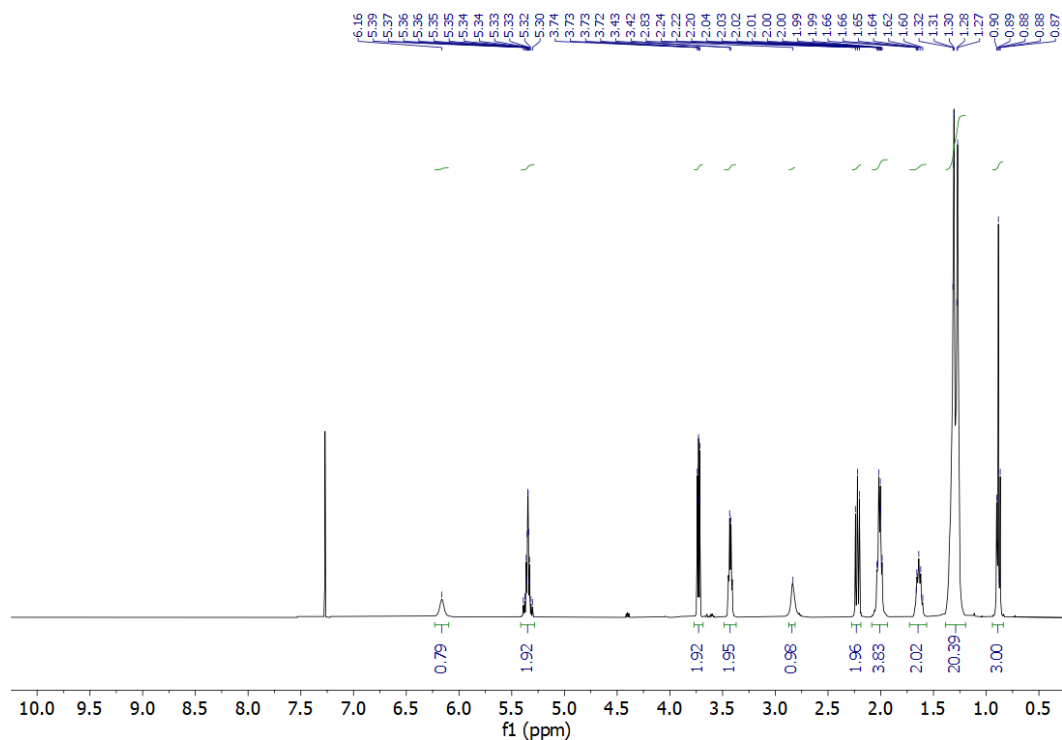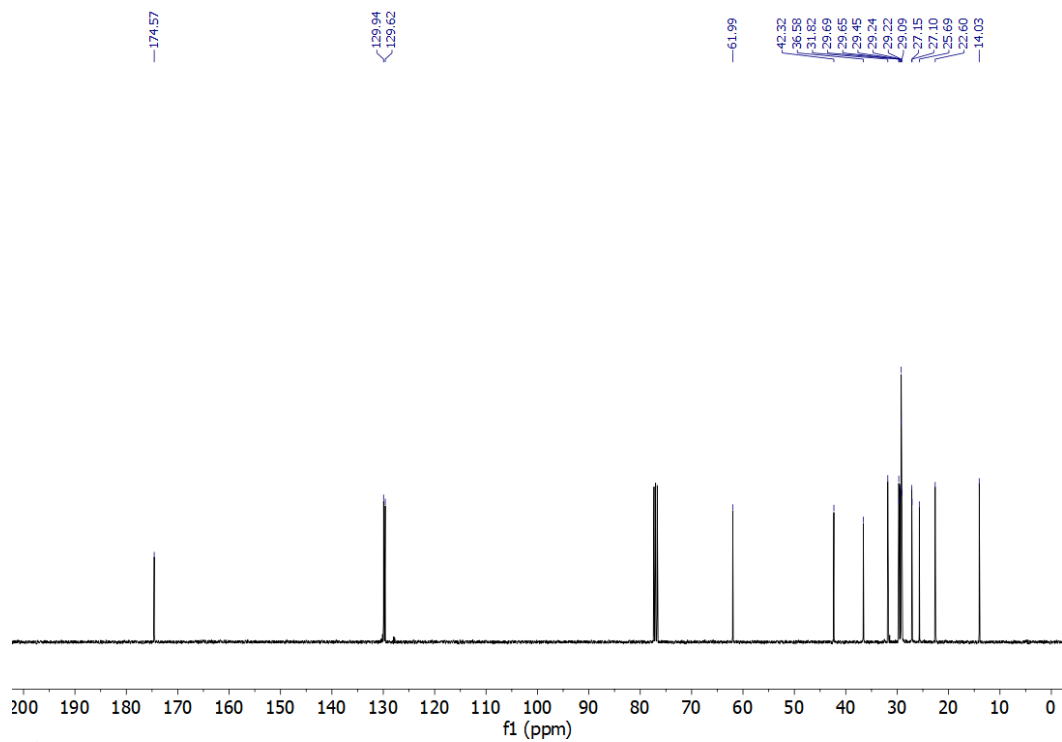

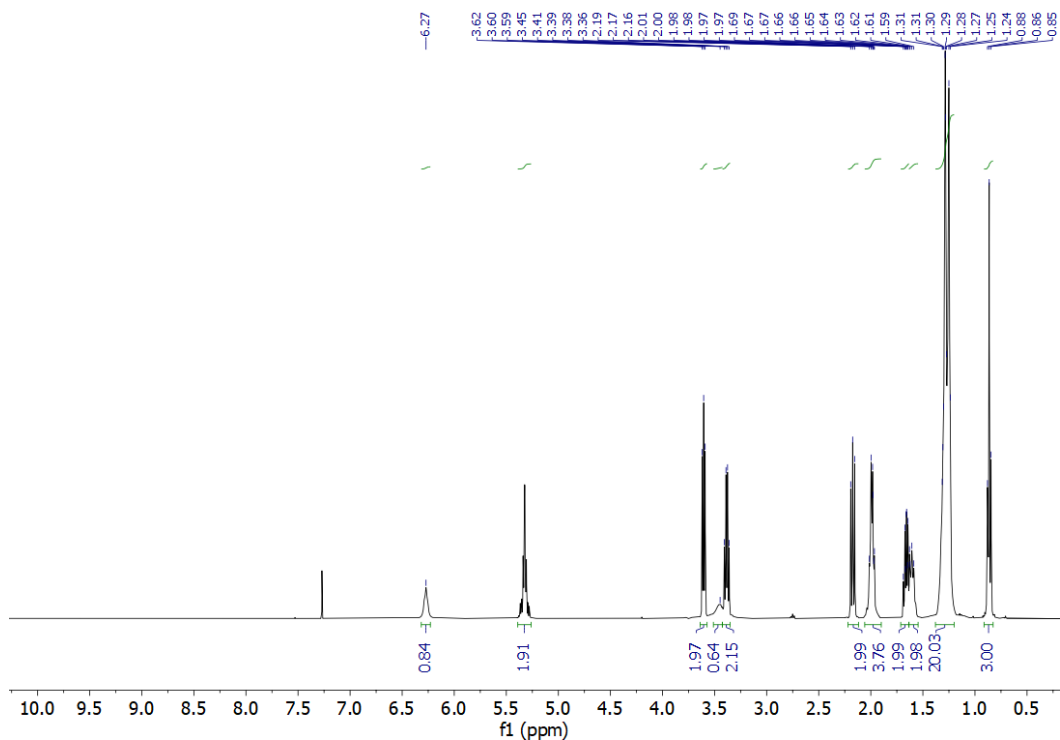

Figure 3S –  $^1\text{H}$  NMR spectrum (400 MHz) of *N*-(3-Hydroxypropyl)oleamide **5** in  $\text{CDCl}_3$ .

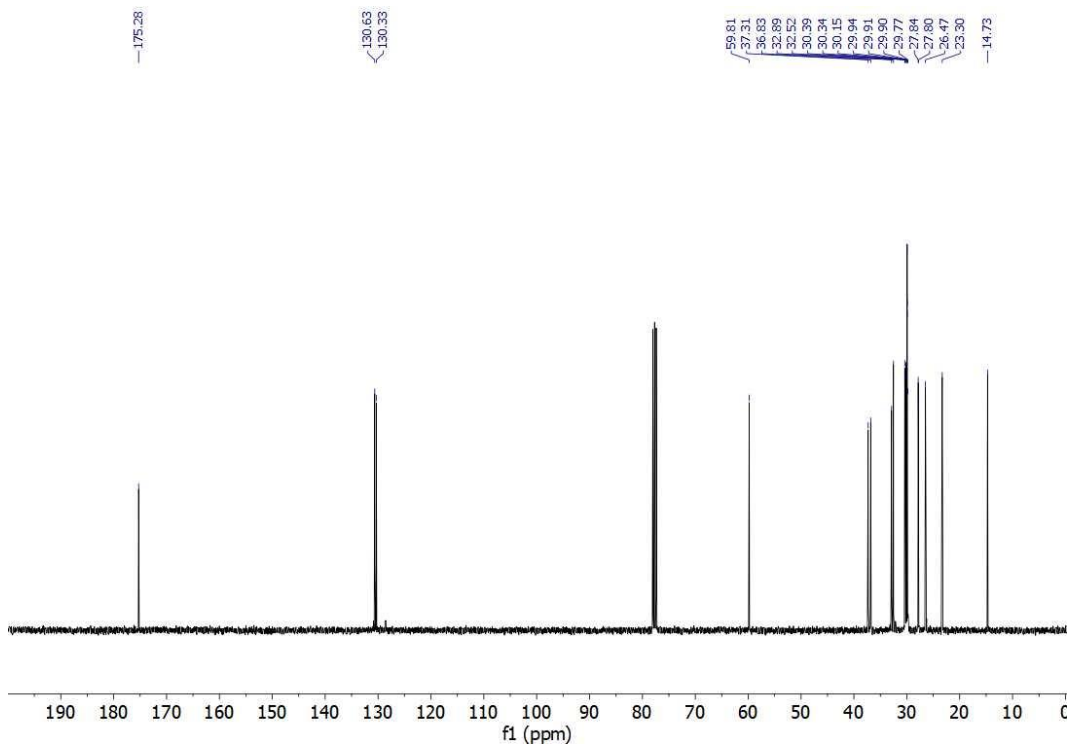

Figure 4S –  $^{13}\text{C}$  NMR spectrum (101 MHz) of *N*-(3-Hydroxypropyl)oleamide **5** in  $\text{CDCl}_3$ .



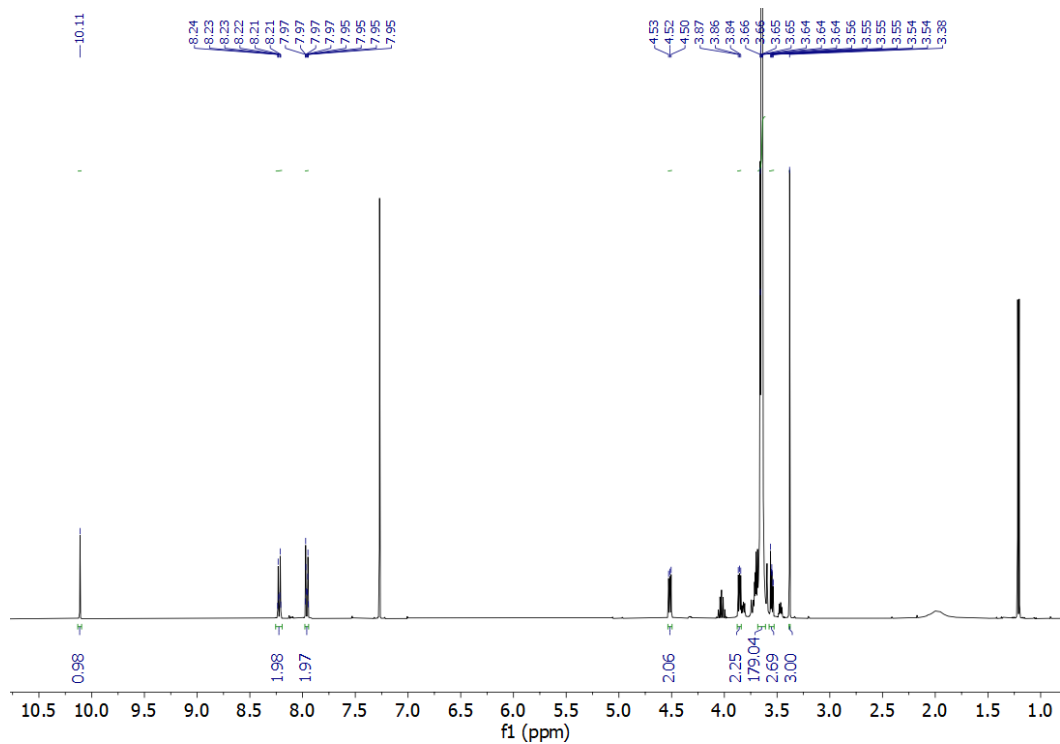

Figure 5S –  $^1\text{H}$  NMR spectrum (400 MHz) of mPEG-benzaldehyde **6** in  $\text{CDCl}_3$

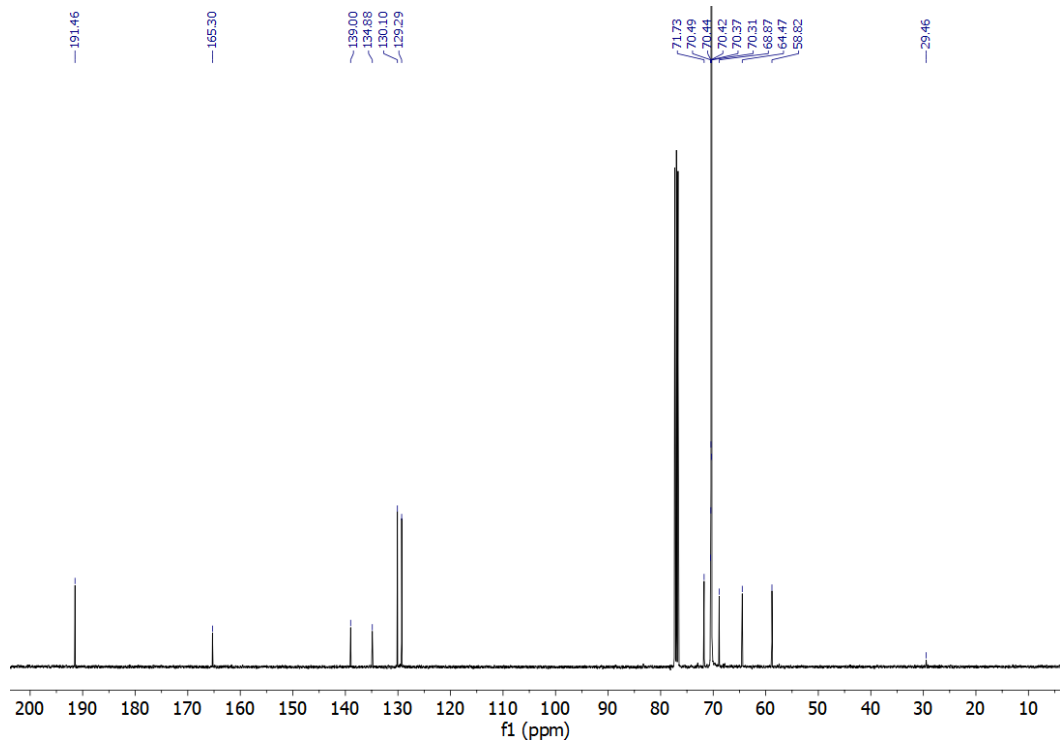

Figure 6S –  $^{13}\text{C}$  NMR spectrum (101 MHz) of mPEG-benzaldehyde **6** in  $\text{CDCl}_3$

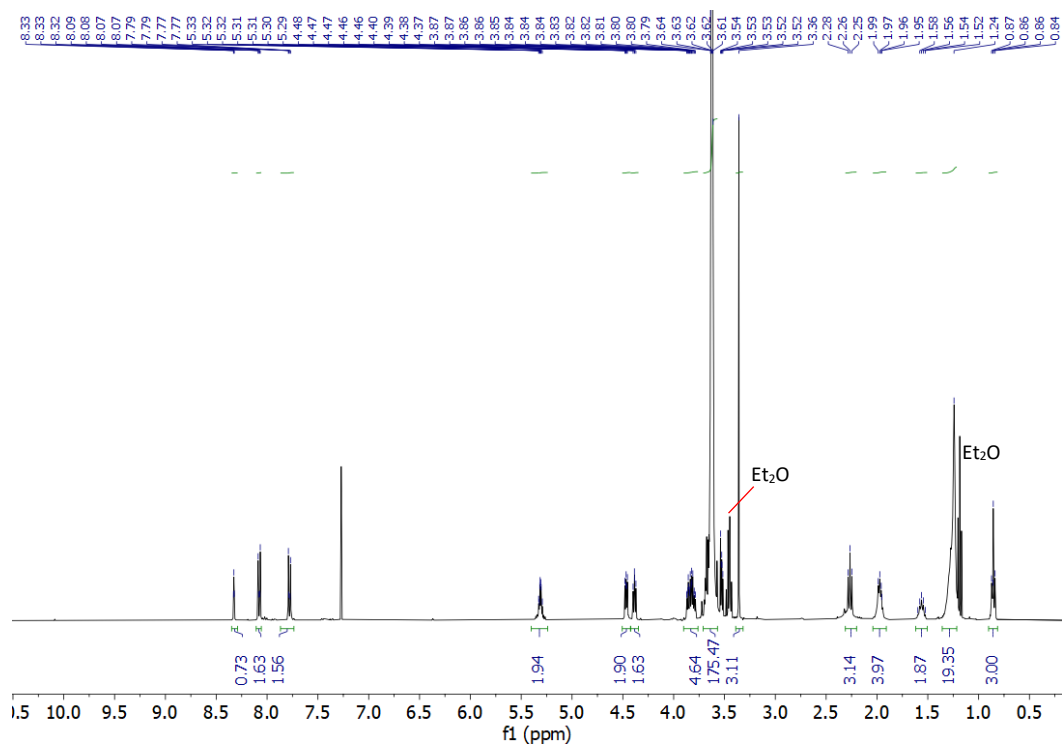

Figure 7S – <sup>1</sup>H NMR spectrum (400 MHz) of mPEG-C<sub>2</sub>-lipid **9** in CDCl<sub>3</sub>

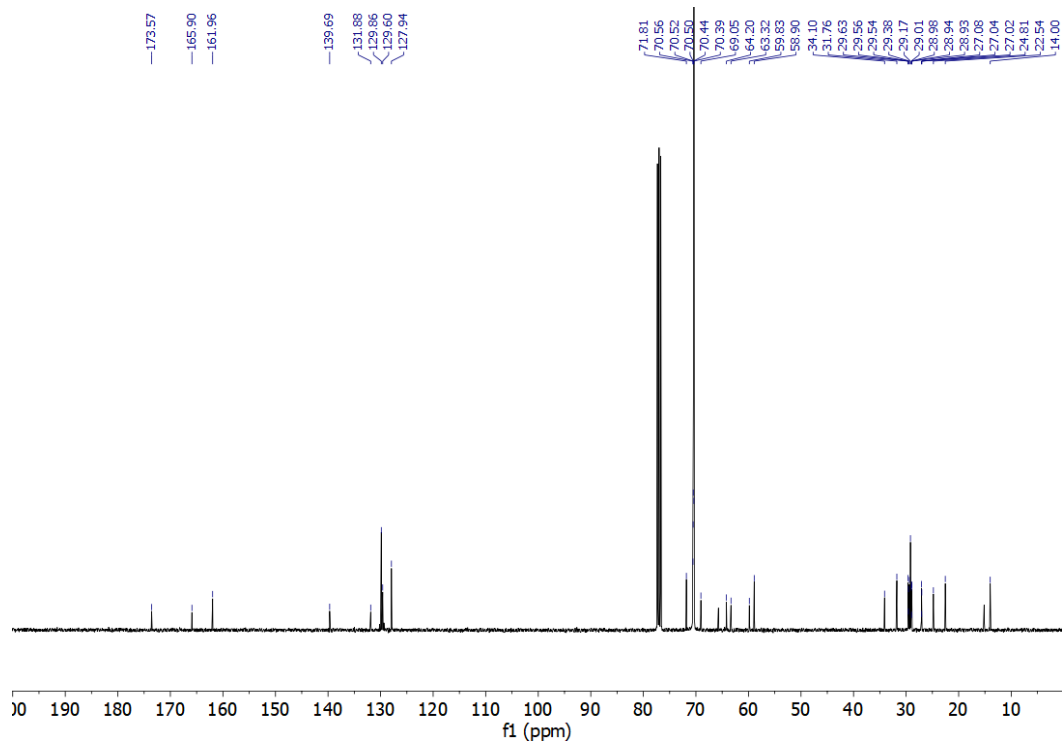

Figure 8S – <sup>13</sup>C NMR spectrum (101 MHz) of mPEG-C<sub>2</sub>-lipid **9** in CDCl<sub>3</sub>

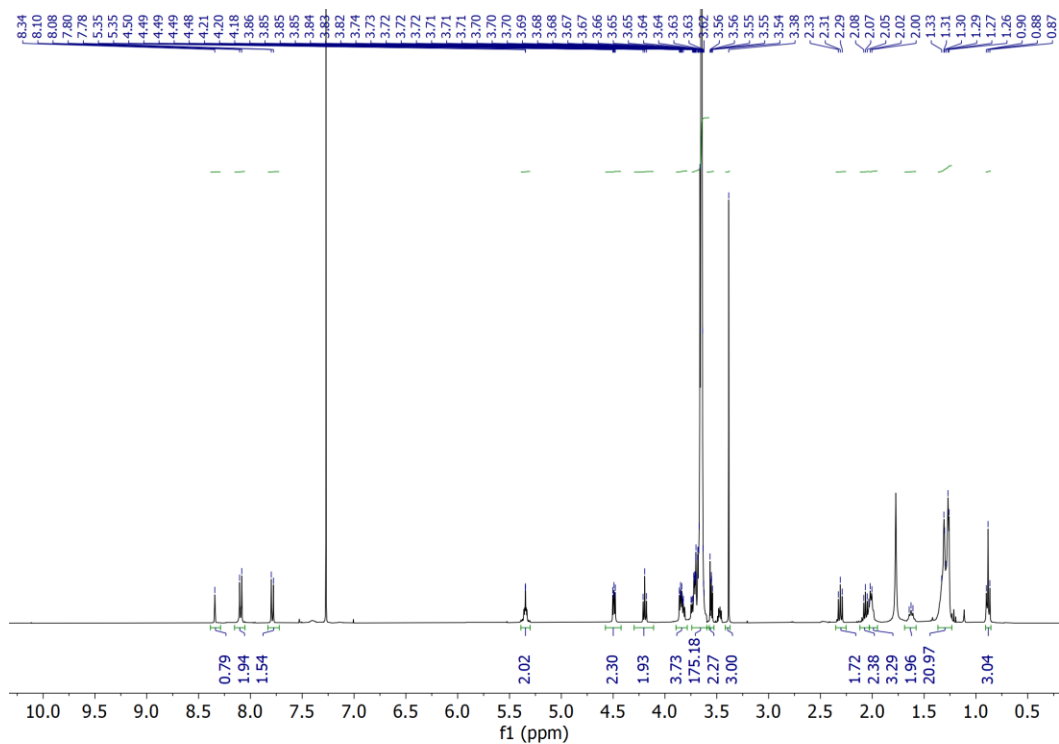

Figure 9S –  $^1\text{H}$  NMR spectrum (400 MHz) of mPEG-C<sub>3</sub>-lipid **10** in CDCl<sub>3</sub>

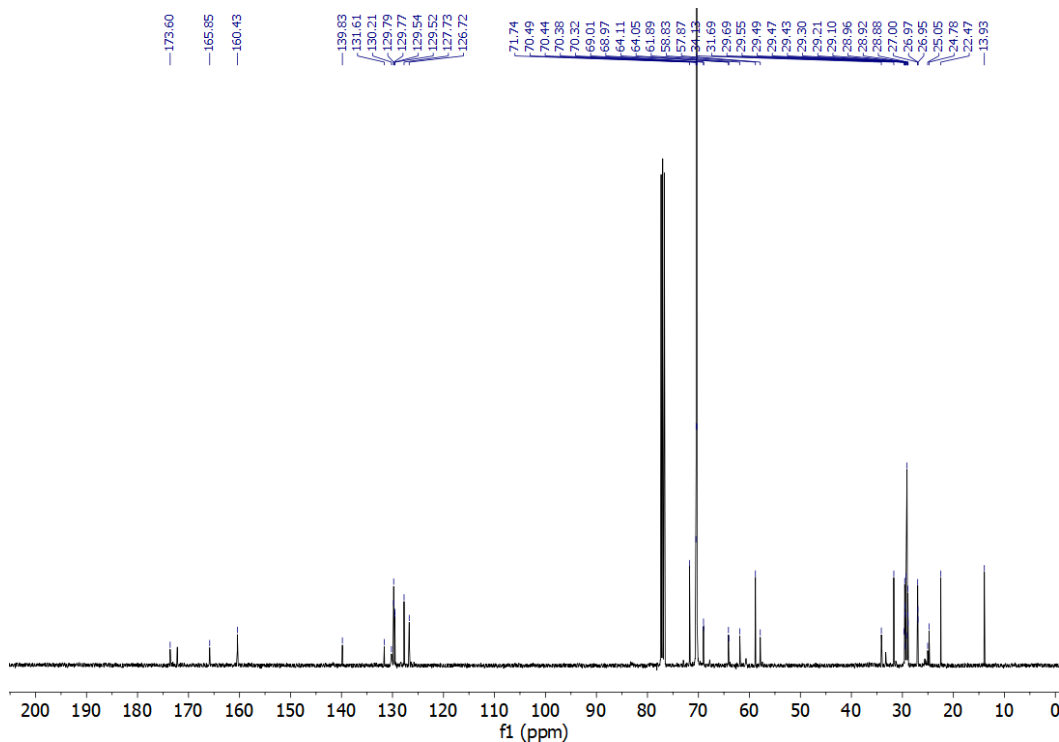

Figure 10S –  $^{13}\text{C}$  NMR spectrum (101 MHz) of mPEG-C<sub>3</sub>-lipid **10** in CDCl<sub>3</sub>

#### 4. Hydrolysis study of mPEG-C2-lipid

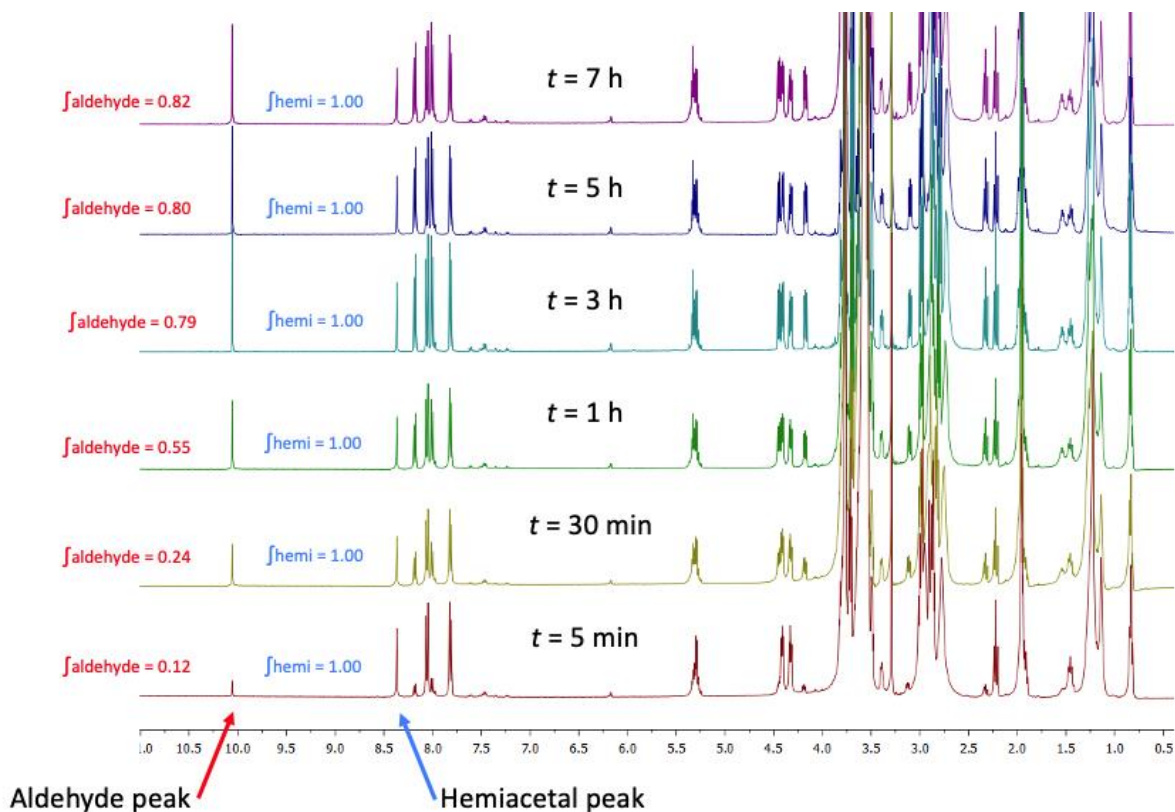

Figure 11S – Overlaid <sup>1</sup>H NMR spectra (400 MHz, HEPES buffer 0.2 M in D<sub>2</sub>O) of mPEG-C<sub>2</sub>-lipid at pH 7.4 over time. The hydrolysis percentage was set as the ratio of the aldehyde integral to the sum of aldehyde and hemiacetal integrals (equation 2).

## 5. Critical micellar concentration

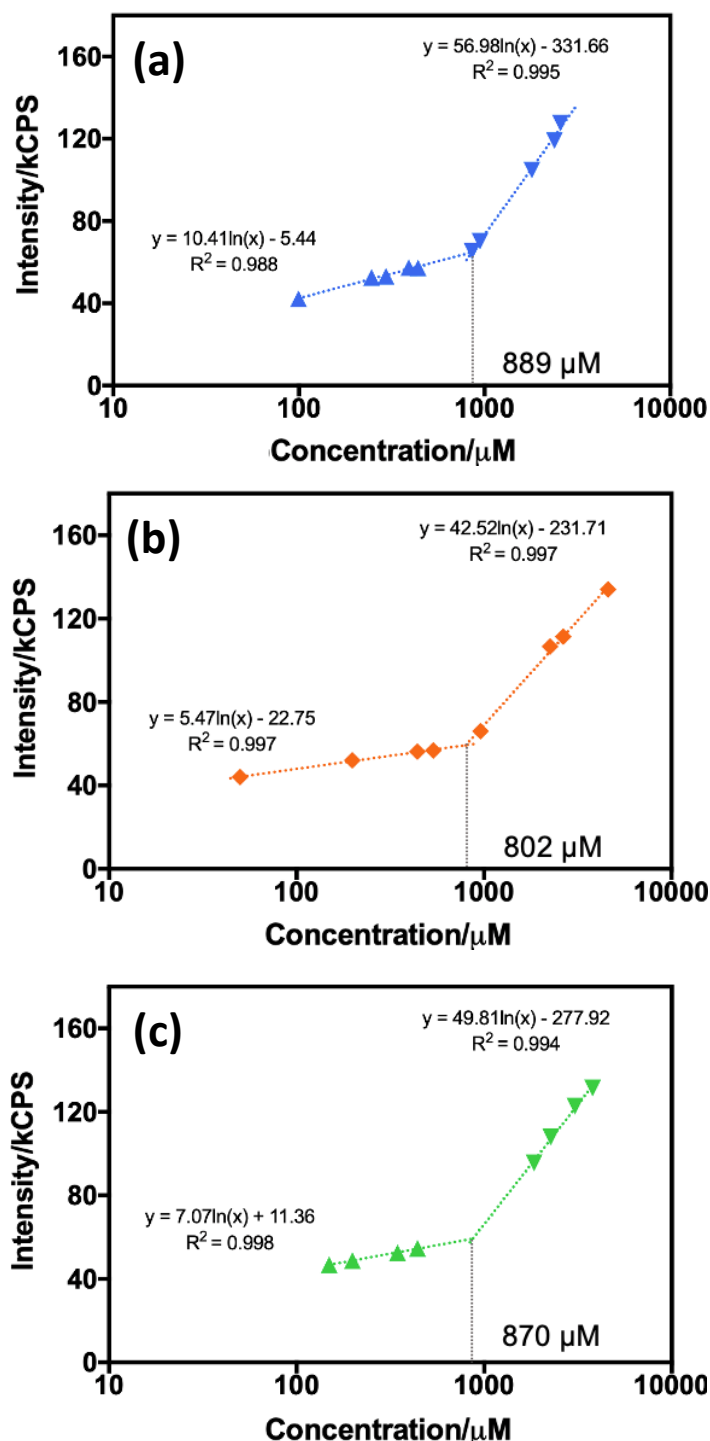

Figure 12S – Individual fitting of critical micellar concentration measurements represented as a plot of intensity of scattered light as a function of concentration of mPEG-C<sub>2</sub>-lipid obtained by dynamic light scattering at 173° recorded as kilo counts per second (kCPS); (a) in ultrapure water, (b) second measurement in ultrapure water, and (c) at pH 8.0 in 25 mM TRIS buffer.
